# Supplementary material for: Sequence-independent, site-specific incorporation of chemical modifications to generate light-activated plasmids
Source: Royal Society of Chemistry journal article supplement (doi:10.1039/d3sc02761a), 2023-01-01
Supplement: d3sc02761a1.pdf [file d3sc02761a1.pdf]

## Supplementary Information

### Sequence-independent, site-specific incorporation of chemical modifications to generate light-activated plasmids

**Authors:** Khoa Chung,<sup>1</sup> Michael J. Booth<sup>1,2\*</sup>

**Affiliations:**

<sup>1</sup>Department of Chemistry, University of Oxford, Mansfield Road, OX1 3TA, Oxford, UK.

<sup>2</sup>Department of Chemistry, University College London, 20 Gordon Street, London WC1H 0AJ, U.K.

\*Correspondence: [m.j.booth@ucl.ac.uk](mailto:m.j.booth@ucl.ac.uk)

|                                                                                                                |    |
|----------------------------------------------------------------------------------------------------------------|----|
| Contents                                                                                                       |    |
| DNA Sequences .....                                                                                            | 3  |
| Supplementary Table 1. Primers used to assess dinucleotides at the ligation junction .....                     | 3  |
| Supplementary Table 2. mV_nicks and mNG_BbvCI plasmid sequences.....                                           | 3  |
| Supplementary Table 3. Primers used for PCR, RT-qPCR and NEEL .....                                            | 7  |
| Supplementary Table 4. Primers used to synthesise the backbones and inserts for homologous recombination ..... | 8  |
| Supplementary Table 5. Backbone and insert combinations for homologous recombination .....                     | 8  |
| Supplementary Table 6. HPLC Purification of the PCB oligos .....                                               | 8  |
| Supplementary Data.....                                                                                        | 9  |
| SI Figure 1. Different Kunkel methods were employed to resynthesise the plasmid.....                           | 9  |
| SI Figure 2. NEEL with all possible dinucleotide combinations at the ligation junction .....                   | 10 |
| SI Figure 3. DpnI removal of unreacted plasmids.....                                                           | 11 |
| SI Figure 4. Confirming synthesis of the T7 PCB oligo .....                                                    | 12 |
| SI Figure 5. PCB oligo was unaffected by annealing conditions .....                                            | 13 |
| SI Figure 6. Comparison between MVS and WTS LA-plasmids.....                                                   | 14 |
| SI Figure 7. Negative controls without amino modifications .....                                               | 15 |
| SI Figure 8. CFPS of T7 NEEL plasmids including the native plasmid. ....                                       | 16 |
| SI Figure 9. Confirming synthesis of the CMV PCB oligo A. ....                                                 | 17 |
| SI Figure 10. Cell viability assay with optimised UV settings for transfection .....                           | 18 |
| SI Figure 11. CMV LA-plasmids and their uncaging .....                                                         | 19 |
| SI Figure 12. RT-qPCR and fluorescence measurements of CMV NEEL plasmids, including the native plasmid .....   | 20 |
| SI Figure 13. GAPDH transcription levels after transfection with modified plasmids .....                       | 21 |
| References.....                                                                                                | 22 |

## DNA Sequences

### Supplementary Table 1. Primers used to assess dinucleotides at the ligation junction

The primers followed the format X\_Y\_FOR or X\_Y\_phos where X represents the nucleotide at the 3'-end and Y represents the nucleotide at the 5'-end of the ligation junction. 'phos' primers were already 5' phosphorylated.

| Name     | Sequence                |
|----------|-------------------------|
| C C FOR  | CTGAAGCTCATCTGCACC      |
| G T FOR  | TCCAGGAGCGCACCATCTTC    |
| T C FOR  | CAAGGACGACGGCAACTAC     |
| G C FOR  | CATCGAGCTGAAGGGCATC     |
| C T FOR  | TTCAAGGAGGACGGCAACATCC  |
| G G FOR  | GGAATTCTCGAGTAAGGTTAACC |
| T A FOR  | ATATCCGGAAGCTTGGCACTGG  |
| G A FOR  | AGCGGTATCAGCTCACTC      |
| C A FOR  | AAGTCAGAGGTGGCGAAACCC   |
| A A FOR  | AGCGTGGCGCTTTCTCATAGC   |
| T G phos | GTAGGTCGTTGCTCCAAGC     |
| A G FOR  | GTAAACTTGGTCTGACAGTTACC |
| A T FOR  | TCTCAGCGATCTGTCTATTTCG  |
| T T FOR  | TCATCCATAGTTGCCTGAC     |
| C G phos | GAGTTGCTCTTGCCCGGCGTC   |
| A C phos | CACGAAATGTTGAATACTC     |

### Supplementary Table 2. mV\_nicks and mNG\_BbvCI plasmid sequences

| Plasmid  | Sequence                                                                                                                                                                                                                                                                                                                                                                                                                                                                                                                                                                                                                                                                                                                                                                                                                                                                                                                                                                                                                                                                                                                       |
|----------|--------------------------------------------------------------------------------------------------------------------------------------------------------------------------------------------------------------------------------------------------------------------------------------------------------------------------------------------------------------------------------------------------------------------------------------------------------------------------------------------------------------------------------------------------------------------------------------------------------------------------------------------------------------------------------------------------------------------------------------------------------------------------------------------------------------------------------------------------------------------------------------------------------------------------------------------------------------------------------------------------------------------------------------------------------------------------------------------------------------------------------|
| mV_nicks | GCTAGTGGTGCTAGCCCCGCGAAATTAATACGACTCACTATAGG<br>GTCTAGAAATAATTTTGTTTAACTTTAAGAAGGAGGTATACATA<br>TGGTGAGCAAGGGCGAGGAGCTGTTACCCGGGGTGGTGCCCAT<br>CCTGGTCGAGCTGGACGGCGACGTAAACGGCCACAAGTTCAGC<br>GTGTCCGGCGAGGGCGAGGGCGATGCCACCTACGGCAAGCTGA<br>CCCTGAAGCTCATCTGCACCACCGGCAAGCTGCCCGTGCCCTGG<br>CCCACCCTCGTGACCACCCTCGGCTACGGCCTGCAGTGCTTCGC<br>CCGCTACCCCGACCACATGAAGCAGCACGACTTCTTCAAGTCCG<br>CCATGCCCGAAGGCTACGTCCAGGAGCGCACCATCTTCTTCAAG<br>GACGACGGCAACTACAAGACCCGCGCCGAGGTGAAGTTCGAGG<br>GCGACACCCTGGTGAACCGCATCGAGCTGAAGGGCATCGACTT<br>CAAGGAGGACGGCAACATCCTGGGGCACAAGCTGGAGTACAAC<br>TACAACAGCCACAACGTCTATATCACCGCCGACAAGCAGAAGA<br>ACGGCATCAAGGCCAACTTCAAGATCCGCCACAACATCGAGGA<br>CGGCGGCGTGACGCTCGCCGACCACTACCAGCAGAACACCCCC<br>ATCGGCGACGGCCCCGTGCTGCTGCCCGACAACCACTACCTGAG<br>CTACCAGTCCAAGCTGAGCAAAGACCCCAACGAGAAGCGCGAT<br>CACATGGTCCTGCTGGAGTTCGTGACCGCCGCGGGATCACTCT<br>CGGCATGGACGAGCTGTACAAGTAATGACCTCAGCGGATCCGC<br>TCTTCCGGGAATTCTCGAGTAAGGTTAACCTGCAGGAGGCCTTT<br>AATTAAGGTGGTGCGGCCGCGCTAGCGGTCCCGGGGGATCGAT<br>CCGGCTGCTAACAAAGCCCGAAAGGAAGCTGAGTTGGCTGCTG<br>CCACCGCTGAGCAATAACTAGCATAACCCCTTGGGGCCTCTAAA |

|           |                                                                                                                                                                                                                                                                                                                                                                                                                                                                                                                                                                                                                                                                                                                                                                                                                                                                                                                                                                                                                                                                                                                                                                                                                                                                                                                                                                                                                                                                                                                                                                                                                                                                                                                                                                                                                                                                                                                                                                                                                                                                                                                                                                                                                                                                                                                                                      |
|-----------|------------------------------------------------------------------------------------------------------------------------------------------------------------------------------------------------------------------------------------------------------------------------------------------------------------------------------------------------------------------------------------------------------------------------------------------------------------------------------------------------------------------------------------------------------------------------------------------------------------------------------------------------------------------------------------------------------------------------------------------------------------------------------------------------------------------------------------------------------------------------------------------------------------------------------------------------------------------------------------------------------------------------------------------------------------------------------------------------------------------------------------------------------------------------------------------------------------------------------------------------------------------------------------------------------------------------------------------------------------------------------------------------------------------------------------------------------------------------------------------------------------------------------------------------------------------------------------------------------------------------------------------------------------------------------------------------------------------------------------------------------------------------------------------------------------------------------------------------------------------------------------------------------------------------------------------------------------------------------------------------------------------------------------------------------------------------------------------------------------------------------------------------------------------------------------------------------------------------------------------------------------------------------------------------------------------------------------------------------|
|           | <p>CGGGTCTTGAGGGGTTTTTTGCTGAAAGGAGGAACTATATCCGG<br/> AAGCTTGGCACTGGCCGACCGGGTTCGAGCACTGACTCGCTGC<br/> GCTCGGTCGTTTCGGCTGCGGCGAGCGGTATCAGCTCACTCAAAG<br/> GCGGTAATACGGTTATCCACAGAATCAGGGGATAACGCAGGAA<br/> AGAACATGTGAGCAAAGGCCAGCAAAGGCCAGGAACCGTA<br/> AAAAGGCCGCGTTGCTGGCGTTTTTCCATAGGCTCCGCCCCCT<br/> GACGAGCATCACAAAAATCGACGCTCAAGTCAGAGGTGGCGAA<br/> ACCCGACAGGACTATAAAGATAACCAGGCGTTTCCCCCTGGAAG<br/> CTCCCTCGTGCCTCTCCTGTTCCGACCCTGCCGCTTACCGGATA<br/> CCTGTCCGCCTTTCTCCCTTCGGGAAGCGTGGCGCTTTCTCATAG<br/> CTCACGCTGTAGGTATCTCAGTTCGGTGTAGGTCGTTTCGCTCCA<br/> AGCTGGGCTGTGTGCACGAACCCCCCGTTCAGCCCGACCGCTGC<br/> GCCTTATCCGGTAACTATCGTCTTGAGTCCAACCCGCTAAGACA<br/> CGACTTATCGCCACTGGCAGCAGCCACTGGTAACAGGATTAGCA<br/> GAGCGAGGTATGTAGGCGGTGCTACAGAGTTCTTGAAGTGGTG<br/> GCCTAACTACGGCTACACTAGAAGAACAGTATTTGGTATCTGCG<br/> CTCTGCTGAAGCCAGTTACCTTCGGAAAAAGAGTTGGTAGCTCT<br/> TGATCCGGCAAACAAACCACCGCTGGTAGCGGTGGTTTTTTTGT<br/> TTGCAAGCAGCAGATTACGCGCAGAAAAAAAGGATCTCAAGAA<br/> GATCCTTTGATCTTTTCTACGGGGTCTGACGCTCAGTGAACGA<br/> AAACTCACAGATCCGGGATTTTGGTTCATGAGATTATCAAAAAGG<br/> ATCTTCACCTAGATCCTTTTAAATTA AAAATGAAGTTTTAAATC<br/> AATCTAAAGTATATATGAGTAACTTGGTCTGACAGTTACCAAT<br/> GCTTAATCAGTGAGGCACCTATCTCAGCGATCTGTCTATTTTCGTT<br/> CATCCATAGTTGCCTGACTCCCCGTCGTGTAGATAACTACGATA<br/> CGGGAGGGCTTACCATCTGGCCCCAGTGCTGCAATGATACCGCG<br/> AGACCCACGCTCACCGGCTCCAGATTTATCAGCAATAAACCAGC<br/> CAGCCGGAAGGGCCGAGCGCAGAAGTGGTCCTGCAACTTTATC<br/> CGCCTCCATCCAGTCTATTAATTGTTGCCGGGAAGCTAGAGTAA<br/> GTAGTTCGCCAGTTAATAGTTTGCGCAACGTTGTTGCCATTGCT<br/> ACAGGCATCGTGGTGTACGCTCGTCGTTTGGTATGGCTTCATT<br/> CAGCTCCGGTTCCCAACGATCAAGGCGAGTTACATGATCCCCCA<br/> TGTTGTGCAAAAAAGCGGTTAGCTCCTTCGGTCCCTCCGATCGTT<br/> GTCAGAAGTAAGTTGGCCGAGTGTTATCACTCATGGTTATGGC<br/> AGCACTGCATAATTCTTTACTGTGTCATGCCATCCGTAAGATGCTT<br/> TTCTGTGACTGGTGAGTACTCAACCAAGTCATTCTGAGAATAGT<br/> GTATGCGGCGACCGAGTTGCTCTTGCCCGGCGTCAATACGGGAT<br/> AATACCGCGCCACATAGCAGA ACTTTAAAAGTGCTCATCATTGG<br/> AAAACGTTCTTCGGGGCGAAA ACTCTCAAGGATCTTACCGCTGT<br/> TGAGATCCAGTTCGATGTAACCCACTCGTGCACCCAACTGATCT<br/> TCAGCATCTTTTACTTTACCAGCGTTTCTGGGTGAGCAAAAAC<br/> AGGAAGGCAA AATGCCGCAAAAAGGGAATAAGGGCGACACG<br/> GAAATGTTGAATACTCATACTCTTCCTTTTTCAATATTATTGAAG<br/> CATTTATCAGGGTTATTGTCTCATGAGCGGATACATATTTGAAT<br/> GTATTTAGAAAAATAAACAAATAGGGGTTCCGCGCACATTTCCC<br/> CGAAAAGT</p> |
| mNG_BbvCI | <p>TCGACCGCCAATTCAATATGGCGTATATGGACTCATGCCAATTC<br/> AATATGGTGGATCTGGACCTGTGCCAATTCAATATGGCGTATAT<br/> GGACTCGTGCCAATTCAATATGGTGGATCTGGACCCAGCCAAT<br/> TCAATATGGCGGACTTGGCACCATGCCAATTCAATATGGCGGAC</p>                                                                                                                                                                                                                                                                                                                                                                                                                                                                                                                                                                                                                                                                                                                                                                                                                                                                                                                                                                                                                                                                                                                                                                                                                                                                                                                                                                                                                                                                                                                                                                                                                                                                                                                                                                                                                                                                                                                                                                                                                                                                                                                                             |

CTGGCACTGTGCCAACTGGGGAGGGGTCTACTTGGCACGGTGCC  
AAGTTTGAGGAGGGGTCTTGGCCCTGTGCCAAGTCCGCCATATT  
GAATTGGCATGGTGCCAATAATGGCGGCCATATTGGCTATATGC  
CAGGATCAATATATAGGCAATATCCAATATGGCCCTATGCCAAT  
ATGGCTATTGGCCAGGTTCAATACTATGTATTGGCCCTATGCCA  
TATAGTATTCCATATATGGGTTTTCTATTGACGTAGATAGCCCC  
TCCAATGGGCGGTCCCATATACCATATATGGGGCTTCCTAATA  
CCGCCCATAGCCACTCCCCATTGACGTCAATGGTCTCTATATA  
TGGTCTTTCCTATTGACGTCATATGGGCGGTCCCTATTGACGTATA  
TGGCGCCTCCCCATTGACGTCAATTACGGTAAATGGCCCGCCT  
GGCTCAATGCCATTGACGTCAATAGGACCACCACCATTGACG  
TCAATGGGATGGCTCATTGCCATTCATATCCGTTCTCACGCCCC  
CTATTGACGTCAATGACGGTAAATGGCCCACTTGGCAGTACATC  
AATATCTATTAATAGTAACTTGGCAAGTACATTACTATTGGAAG  
TACGCCAGGGTACATTGGCAGTACTCCATTGACGTCAATGGCG  
GTAATGGCCCGCGATGGCTGCCAAGTACATCCCCATTGACGTC  
AATGGGGAGGGGCAATGACGCAAATGGGCGTTCCATTGACGTA  
AATGGGCGGTAGGCGTGCCTAATGGGAGGTCTATATAAGCAAT  
GCTCGTTTAGGGAACCGCCATTCTGCCTGGGGACGTCGGAGCAA  
GCTTGATTTAGGTGACACTATAGACTTGTTCTTTTTGCAGGATCT  
ACCATGGTGAGCAAGGGCGAGGAGGATAACATGGCCTCTCTCC  
CAGCGACACATGAGTTACACATCTTTGGCTCCATCAACGGTGTG  
GACTTTGACATGGTGGGTGAGGGCACCGGCAATCCAATGATG  
GTTATGAGGAGTTAAACCTGAAGTCCACCAAGGGTGACCTCCA  
GTTCTCCCCCTGGATTCTGGTCCCTCATATCGGGTATGGCTTCCA  
TCAGTACCTGCCCTACCCTGACGGGATGTCGCCTTTCAGGCCG  
CCATGGTAGATGGCTCCGGATACCAAGTCCATCGCACAATGCAG  
TTTGAAGATGGTGCCCTCCCTTACTGTTAACTACCGCTACACCTAC  
GAGGGAAGCCACATCAAAGGAGAGGCCAGGTGAAGGGGACT  
GGTTTCCCTGCTGACGGTCCTGTGATGACCAACTCGCTGACCGC  
TGCGGACTGGTGACGGTTCGAAGAAGACTTACCCCAACGACAAA  
ACCATCATCAGTACCTTTAAGTGGAGTTACACCACTGGAAATGG  
CAAGCGCTACCGGAGCACTGCGCGGACCACCTACACCTTTGCCA  
AGCCAATGGCGGCTAACTATCTGAAGAACCAGCCGATGTACGT  
GTTCCGTAAGACGGAGCTCAAGCACTCCAAGACCGAGCTCAAC  
TTCAAGGAGTGGCAAAAAGGCCTTTACCGATGTGATGGGCATGG  
ACGAGCTGTACAAGGGATCTGGATCCCATCGATTCTGAATCAAG  
GCCTCTCGAGCCTCTAGA ACTATAGTGAGTCGTATTACGTAGAT  
CCAGACATGATAAGATACATTGATGAGTTTGGACAAACCACAA  
CTAGAATGCAGTGAAAAAATGCTTTATTTGTGAAATTTGTGAT  
GCTATTGCTTTATTTGTAACCATTATAAGCTGCAATAAACAAGT  
TAACAACAACAATTGCATTCATTTTATGTTTCAGGTTTCAGGGGG  
AGGTGTGGGAGGTTTTTTAATTCGCGGCCGCGGCCAATGCAT  
TGGGCCCGGTACCCAGCTTTTGTTCCTTTAGTGAGGGTTAATTG  
CGCGCTTGGCGTAATCCCTCAGCATGGTCATAGCTGTTTCCTGT  
GTGAAATTGTTATCCGCTCACAATCCACACAACATACGAGCCG  
GGAGCATAAAGTGTAAGCCTGGGGTGCCTAATGAGTGAGCTA  
ACTCACATTAATTGCGTTGCGCTCACTGCCCGCTTTCAGTCCG  
GAAACCTGTCGTGCCAGCTGCATTAATGAATCGGCCAACGCGCG  
GGGAGAGGCGGTTTGCATATTGGGCGCTCTTCCGCTTCTCTCGCT

CACTGACTCGCTGCGCTCGGTCGTTTCGGCTGCGGCGAGCGGTAT  
CAGCTCACTCAAAGGCGGTAATACGGTTATCCACAGAATCAGG  
GGATAACGCAGGAAAGAACATGTGAGCAAAAGGCCAGCAAAA  
GGCCAGGAACCGTAAAAAGGCCGCGTTGCTGGCGTTTTTCCATA  
GGCTCCGCCCCCTGACGAGCATCACAAAAATCGACGCTCAAGT  
CAGAGGTGGCGAAACCCGACAGGACTATAAAGATACCAGGCGT  
TTCCCCCTGGAAGCTCCCTCGTGCGCTCTCCTGTTCCGACCCTGC  
CGCTTACCGGATACCTGTCCGCCTTTCTCCCTTCGGGAAGCGTG  
GCGCTTTCTCATAGCTCACGCTGTAGGTATCTCAGTTCGGTGTA  
GGTCGTTTCGCTCCAAGCTGGGCTGTGTGCACGAACCCCCCGTTC  
AGCCCGACCGCTGCGCCTTATCCGGTAACTATCGTCTTGAGTCC  
AACCCGGTAAGACACGACTTATCGCCACTGGCAGCAGCCACTG  
GTAACAGGATTAGCAGAGCGAGGTATGTAGGCGGTGCTACAGA  
GTTCTTGAAGTGGTGGCCTAACTACGGCTACACTAGAAGAACAG  
TATTTGGTATCTGCGCTCTGCTGAAGCCAGTTACCTTCGGAAAA  
AGAGTTGGTAGCTCTTGATCCGGCAAACAAACCACCGCTGGTAG  
CGGTGGTTTTTTTTGTTTGCAAGCAGCAGATTACGCGCAGAAAAA  
AAGGATCTCAAGAAGATCCTTTGATCTTTTCTACGGGGTCTGAC  
GCTCAGTGGAACGAAAACCTCACGTTAAGGGATTTTGGTCATGAG  
ATTATCAAAAAGGATCTTCACCTAGATCCTTTTAAATTAATAAT  
GAAGTTTTAAATCAATCTAAAGTATATATGAGTAAACTTGGTCT  
GACAGTTACCAATGCTTAATCAGTGAGGCACCTATCTCAGCGAT  
CTGTCTATTTTCGTTTCATCCATAGTTGCCTGACTCCCCGTCGTGTA  
GATAACTACGATACGGGAGGGCTTACCATCTGGCCCCAGTGCTG  
CAATGATACCGCGAGACCCACGCTCACCGGCTCCAGATTTATCA  
GCAATAAACCAGCCAGCCGGAAGGGCCGAGCGCAGAAGTGGTC  
CTGCAACTTTATCCGCCTCCATCCAGTCTATTAATTGTTGCCGGG  
AAGCTAGAGTAAGTAGTTCGCCAGTTAATAGTTTTCGCAACGTT  
GTTGCCATTGCTACAGGCATCGTGGTGTCACGCTCGTCGTTTGG  
TATGGCTTCATTCAGCTCCGGTCCCAACGATCAAGGCGAGTTA  
CATGATCCCCCATGTTGTGCAAAAAGCGGTTAGCTCCTTCGGT  
CCTCCGATCGTTGTCAGAAGTAAGTTGGCCGACGTTTACT  
CATGGTTATGGCAGCACTGCATAATTCTCTTACTGTTCATGCCATC  
CGTAAGATGCTTTTCTGTGACTGGTGAGTACTCAACCAAGTCAT  
TCTGAGAATAGTGTATGCGGCGACCGAGTTGCTCTTGCCCCGGC  
TCAATACGGGATAATACCGCGCCACATAGCAGAACTTTAAAAG  
TGCTCATCATTGGAAAACGTTCTTCGGGGCGAAAACCTCTCAAGG  
ATCTTACCGCTGTTGAGATCCAGTTCGATGTAACCCACTCGTGC  
ACCCAATGATCTTCAGCATCTTTACTTTCACCAGCGTTTCTGG  
GTGAGCAAAAACAGGAAGGCAAAATGCCGCAAAAAGGGAAT  
AAGGGCGACACGGAAATGTTGAATACTCATACTCTTCCTTTTTTC  
AATATTATTGAAGCATTATCAGGGTTATTGTCTCATGAGCGGA  
TACATATTTGAATGTATTTAGAAAAATAAACAATAGGGGTTCC  
GCGCACATTTCCCCGAAAAGTGCCACCTAAATTGTAAGCGTTAA  
TATTTTGTTAAAATTCGCGTTAAATTTTTGTAAATCAGCTCATT  
TTTTAACCAATAGGCCGAAATCGGCAAAAATCCCTTATAAATCAA  
AAGAATAGACCGAGATAGGGTTGAGTGTTGTTCCAGTTTGGAAC  
AAGAGTCCACTATTAAGAACGTGGACTCCAACGTCAAAGGGC  
GAAAAACCGTCTATCAGGGCGATGGCCCACTACGTGAACCATC  
ACCCTAATCAAGTTTTTTGGGGTTCGAGGTGCCGTAAAGCACTAA

|  |                                                                                                                                                                                                                                                                             |
|--|-----------------------------------------------------------------------------------------------------------------------------------------------------------------------------------------------------------------------------------------------------------------------------|
|  | ATCGGAACCCTAAAGGGAGCCCCGATTTAGAGCTTGACGGGG<br>AAAGCCGGCGAACGTGGCGAGAAAGGAAGGGAAGAAAGCGAA<br>AGGAGCGGGCGCTAGGGCGCTGGCAAGTGTAGCGGTCACGCTG<br>CGCGTAACCACCACACCCGCCGCGCTTAATGCGCCGCTACAGGG<br>CGCGTCCCATTTCGCATTCAGGCTGCGCAACTGTTGGGAAGGGC<br>GATCGGTGCGGGCCTCTTCGCTATTACGCCAG |
|--|-----------------------------------------------------------------------------------------------------------------------------------------------------------------------------------------------------------------------------------------------------------------------------|

**Supplementary Table 3. Primers used for PCR, RT-qPCR and NEEL**

Underlined sequences are the T7 promoter and TATA box. Bolded sequences are the upstream and downstream BRE and Inr elements. **X** represents the amino-C6-dT modifications.

| Name                          | Sequence                                                                                                                                  |
|-------------------------------|-------------------------------------------------------------------------------------------------------------------------------------------|
| mV nick T7T<br>FRW            | TACAAGTAATGACCTCAGCGGATCCGCTCTTCCGGGAATTC<br>TCGAGTAAGG                                                                                   |
| DHFR REV T7S<br>GFP           | ACAGCTCCTCGCCCTTGCTCACCATATGTATACCTCCTTCTT<br>AAAGTTAAAC                                                                                  |
| GFP FRW T7S                   | CGGCATGGACGAGCTGTACAAGTAATGAGGATCCCGGGAA<br>TTCTCGAGTA                                                                                    |
| mV nick T7T<br>REV            | AATTC <sup>u</sup> CCCGGAAGAGCGGATCCGCTGAGGTCATTACTTGTAC<br>AGCTCG                                                                        |
| mNG_BbvCI_FO<br>R1            | GCTTGGCGTAATCCCTCAGCATGGTCATAGCTG                                                                                                         |
| mNG_BbvCI_RE<br>V2            | CAGCTATGACCATGCTGAGGGATTACGCCAAGC                                                                                                         |
| mNG_nick_muta<br>genesis REV1 | CGAGAGGCCTTGAATTCGAATCGATG                                                                                                                |
| mNG_nick_muta<br>genesis FOR2 | CATCGATTCTGAATTCAGGCCTCTCG                                                                                                                |
| mNG_qPCR_FO<br>R              | CGTGTTCGTAAGACGGAGC                                                                                                                       |
| mNG_RT-<br>qPCR REV           | CCTTGTACAGCTCGTCCATGC                                                                                                                     |
| GAPDH_FOR_O<br>rigene         | GTCTCCTCTGACTTCAACAGCG                                                                                                                    |
| GAPDH_REV_I<br>DT             | TCCACCACCCTGTTGCTGTA                                                                                                                      |
| T7_eLong                      | GAAATTAATACGACTCACTATAGGGTCTAG                                                                                                            |
| T7_7amines                    | GAAAT <b>X</b> A <b>X</b> ACGAC <b>X</b> CAC <b>X</b> A <b>X</b> AGGG <b>X</b> C <b>X</b> AG                                              |
| mNG_9amines_4<br>6b           | <b>GG</b> <b>X</b> C <b>X</b> A <b>X</b> A <b>X</b> AAGCA <b>X</b> GC <b>X</b> CGTTTAGGGAAACCGCCAT <b>X</b> C<br><b>X</b> GCC <b>X</b> GG |

**Supplementary Table 4. Primers used to synthesise the backbones and inserts for homologous recombinations**

| <b>PCR</b>       | <b>DNA template</b> | <b>For primer</b> | <b>Rev Primer</b>         |
|------------------|---------------------|-------------------|---------------------------|
| mV nicks BB      | mVenus CT           | mV nick T7T FRW   | DHFR REV T7S GFP          |
| mV nicks insert  | mVenus CT           | GFP FRW T7S       | mV nick T7T REV           |
| mNG_BbvCI_BB     | pCS2-mNG-C plasmid  | mNG_BbvCI_FOR1    | mNG_nick_mutagenesis_REV1 |
| mNG_BbvCI_insert | pCS2-mNG-C plasmid  | mNG_BbvCI_REV2    | mNG_nick_mutagenesis_FOR2 |

**Supplementary Table 5. Backbone and insert combinations for homologous recombinations**

| <b>Plasmid</b> | <b>Backbone</b> | <b>Insert</b>    |
|----------------|-----------------|------------------|
| mV nicks       | mV nicks BB     | mV nicks insert  |
| mNG_BbvCI      | mNG_BbvCI BB    | mNG_BbvCI insert |

**Supplementary Table 6. HPLC Purification of the PCB oligos**

| <b>Promoter</b> | <b>Number of modifications</b> | <b>Collection period/ mins</b> | <b>Increments/ mins</b> | <b>Fractions pooled</b> |
|-----------------|--------------------------------|--------------------------------|-------------------------|-------------------------|
| T7              | 7                              | 24.0-25.5                      | 0.15                    | 5-7                     |
| CMV             | 9                              | 24.0-25.5                      | 0.15                    | 3-5                     |



## Supplementary Data

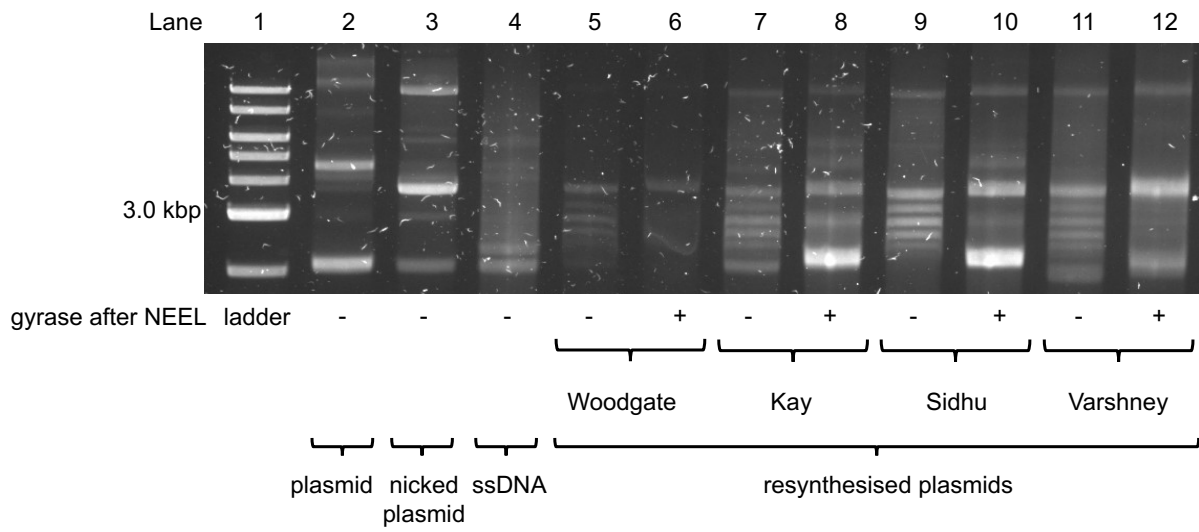

**SI Figure 1. Different Kunkel methods were employed to resynthesise the plasmid.** Kunkel mutagenesis protocols from the Woodgate,<sup>1</sup> Kay,<sup>2</sup> Sidhu,<sup>3</sup> and Varshney<sup>4</sup> laboratories were used to regenerate the plasmid. After ligation, the different plasmids were reacted with gyrase to test for ligation.

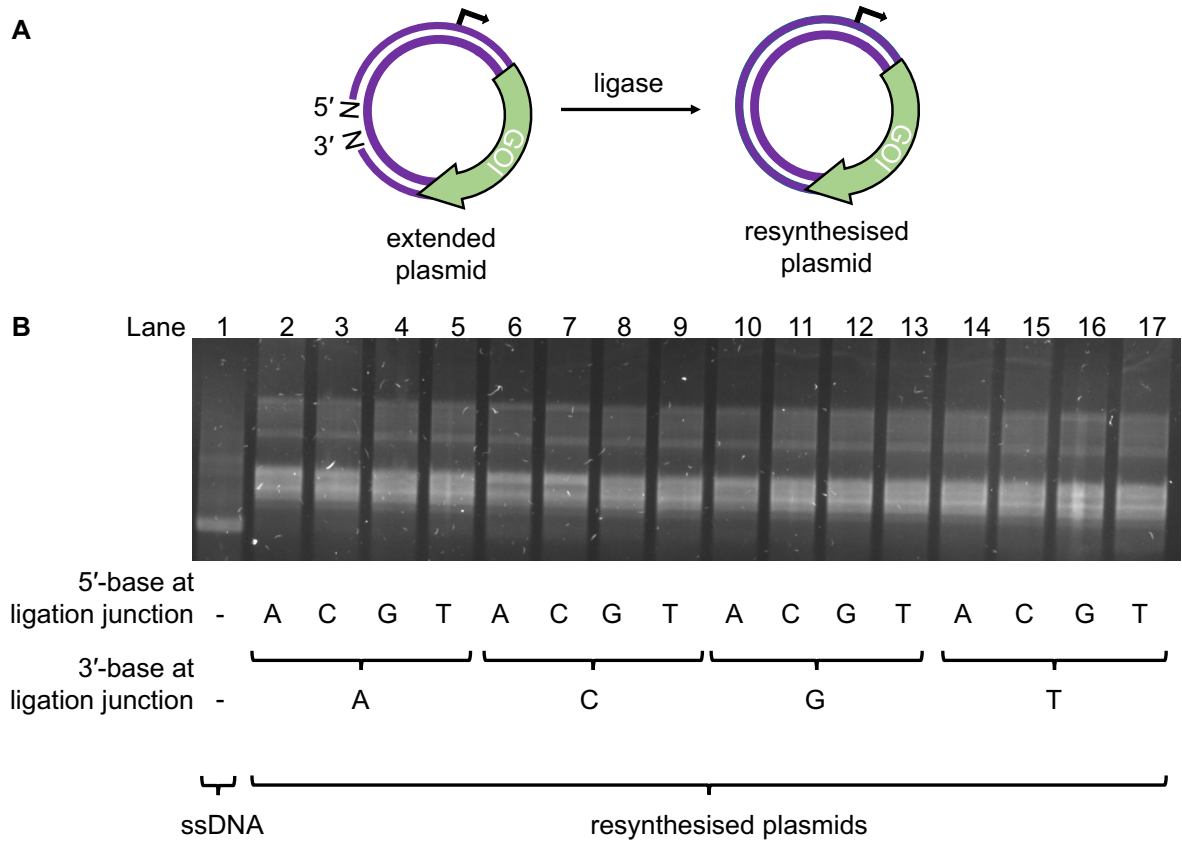

**SI Figure 2. NEEL with all possible dinucleotide combinations at the ligation junction. A.** Depiction of the reaction in **(B)**. **B.** Different primers with varying  $T_m$ , GC content, and lengths were used for NEEL. Ligation at the different ligation junctions was equally effective.

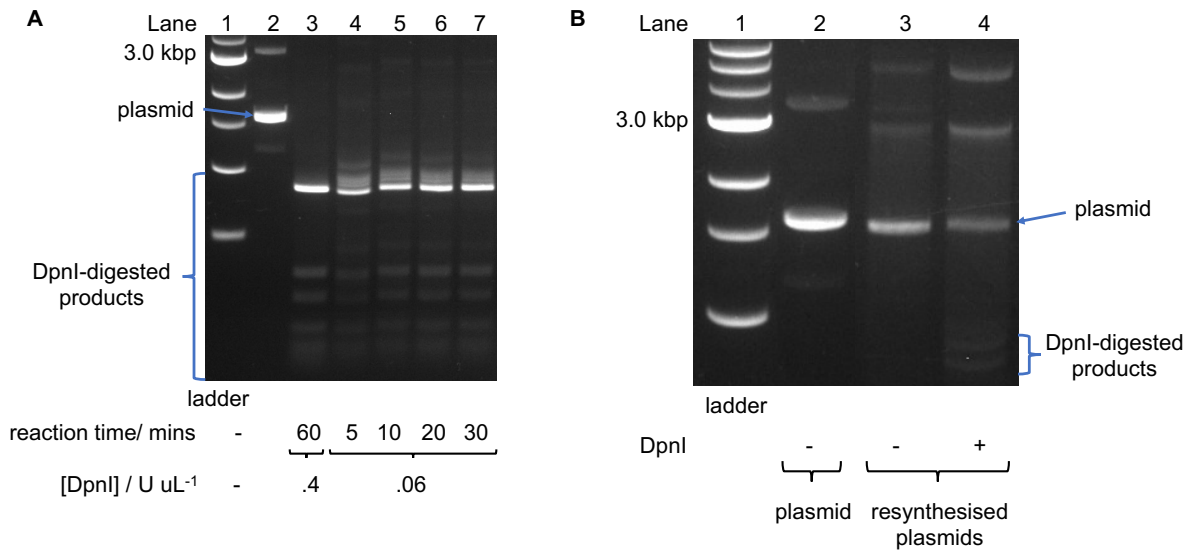

**SI Figure 3. DpnI removal of unreacted plasmids. A.** Mild DpnI conditions were optimised with native mVenus plasmid. **B.** When resynthesised plasmids were reacted with DpnI faint degraded plasmid bands appeared whilst the majority of the resynthesised plasmids were intact.

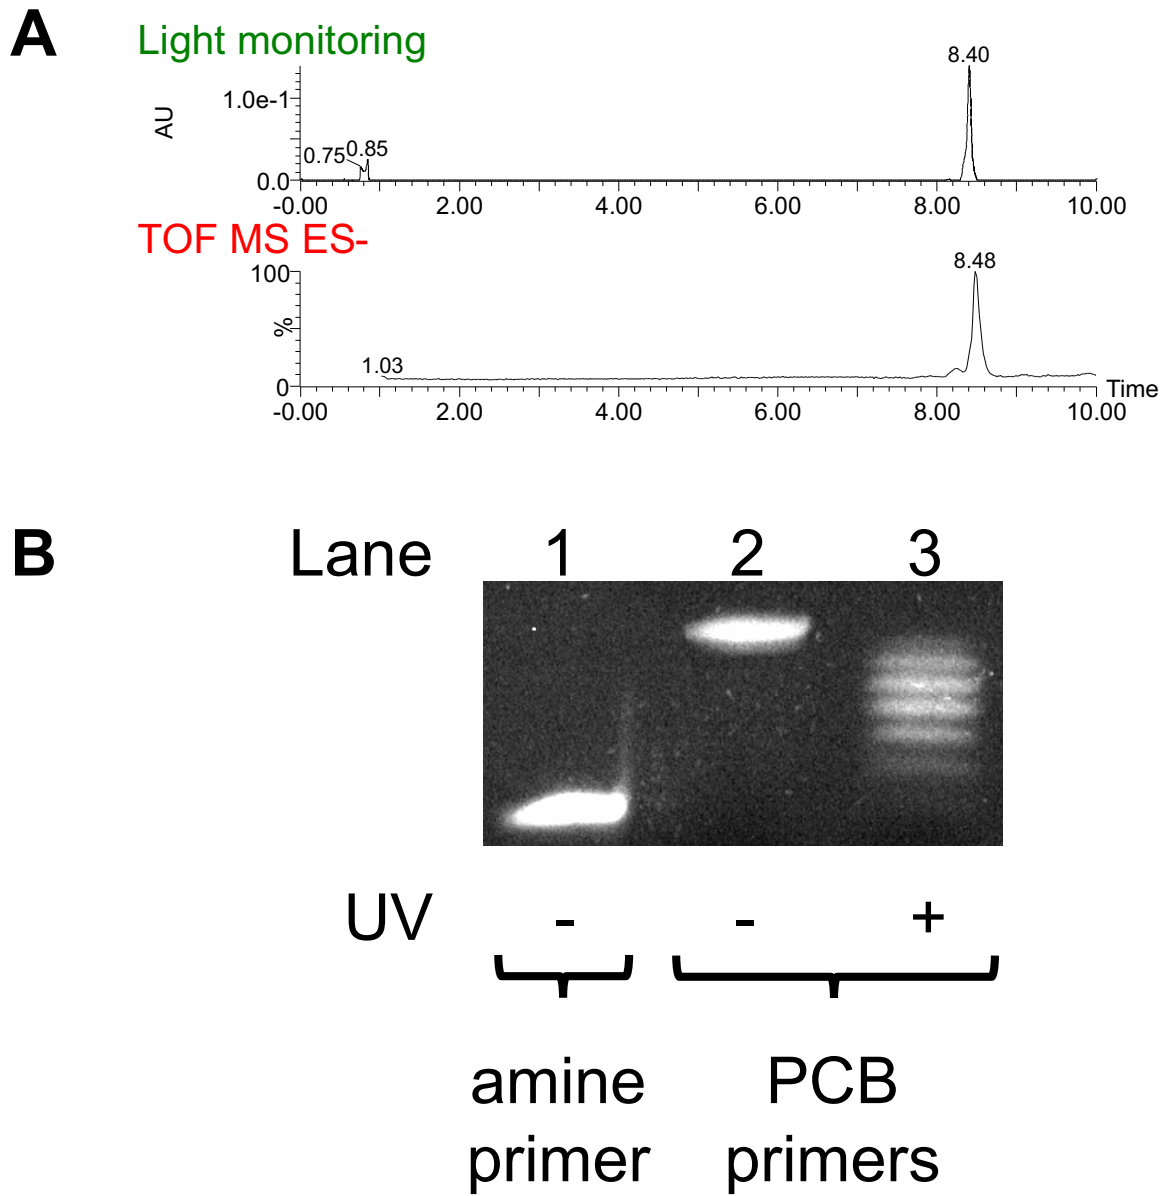

**SI Figure 4. Confirming synthesis of the T7 PCB oligo.** A. LC-MS and B. Denaturing PAGE were used to confirm PCB attachment. MS gave a mass of 15398, which corresponded to the 7-PCBs oligo.

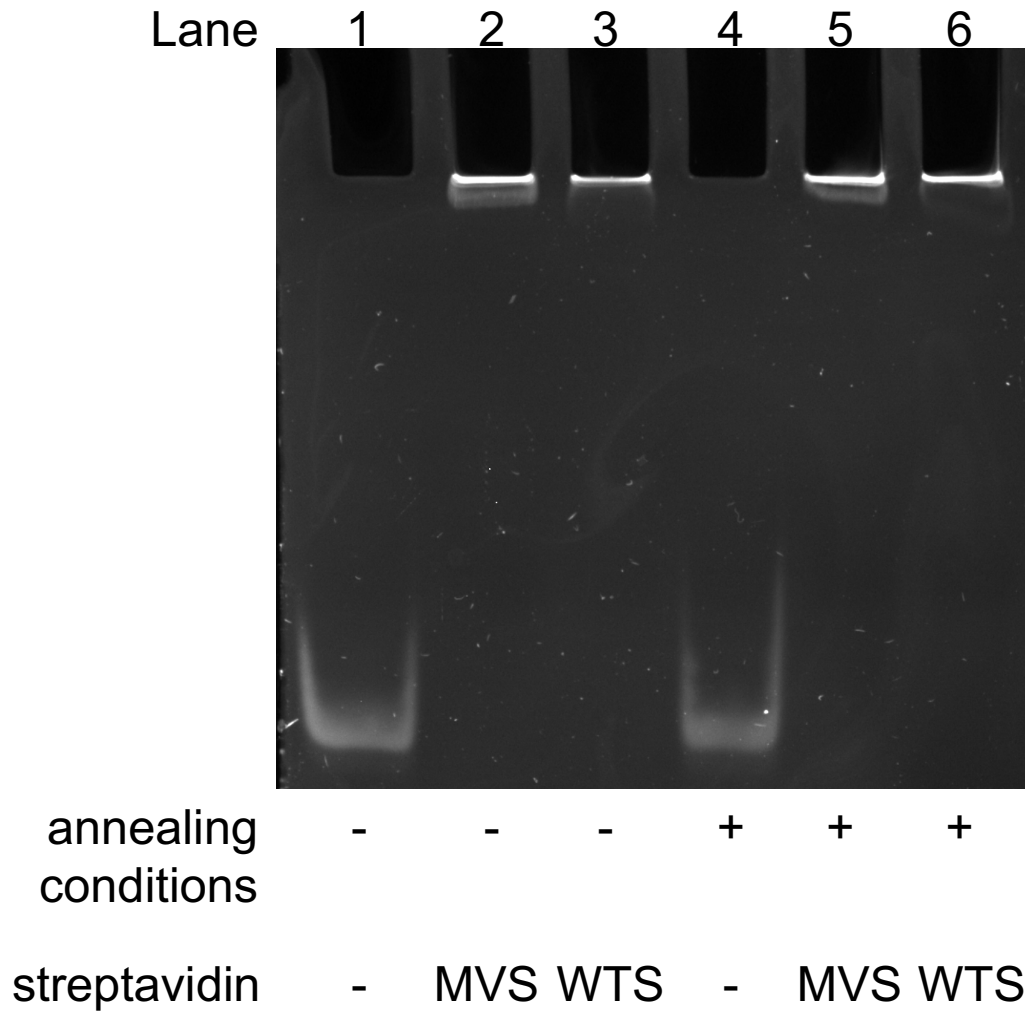

**SI Figure 5. PCB oligo was unaffected by annealing conditions.** PCB oligo was bound to either monovalent or wildtype tetraivalent streptavidin (MVS and WTS, respectively) and incubated in annealing conditions.

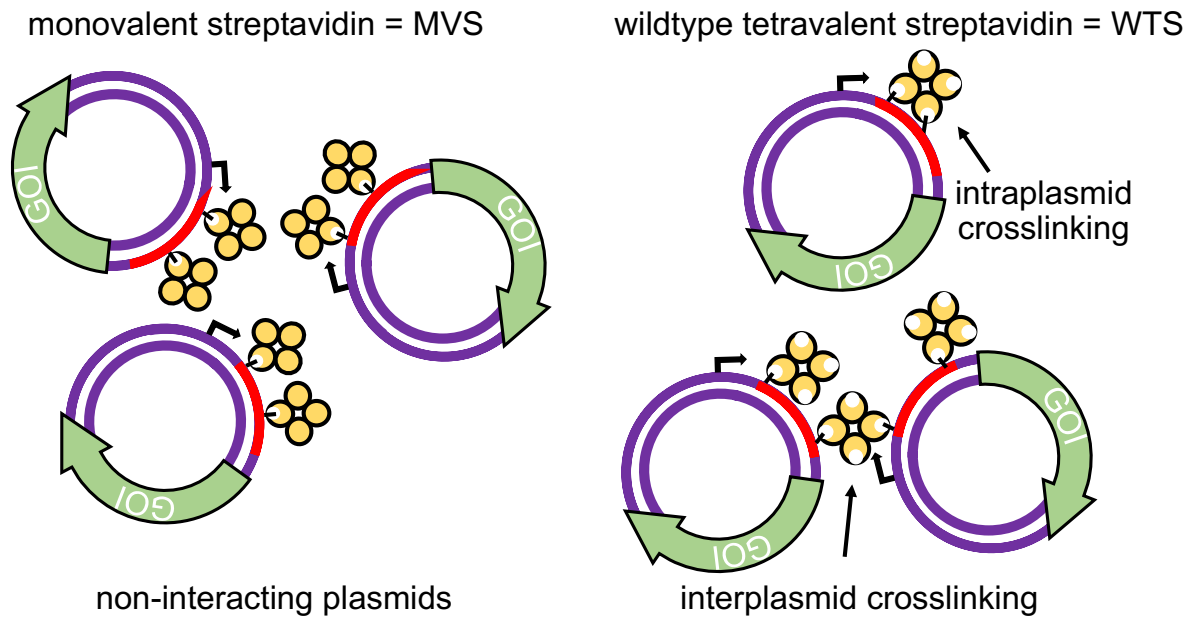

**SI Figure 6. Comparison between MVS and WTS LA-plasmids.** With only a single active subunit, MVS LA-plasmids do not interact. WTS has four active subunits, which may give rise to intra- and interplasmid crosslinking.

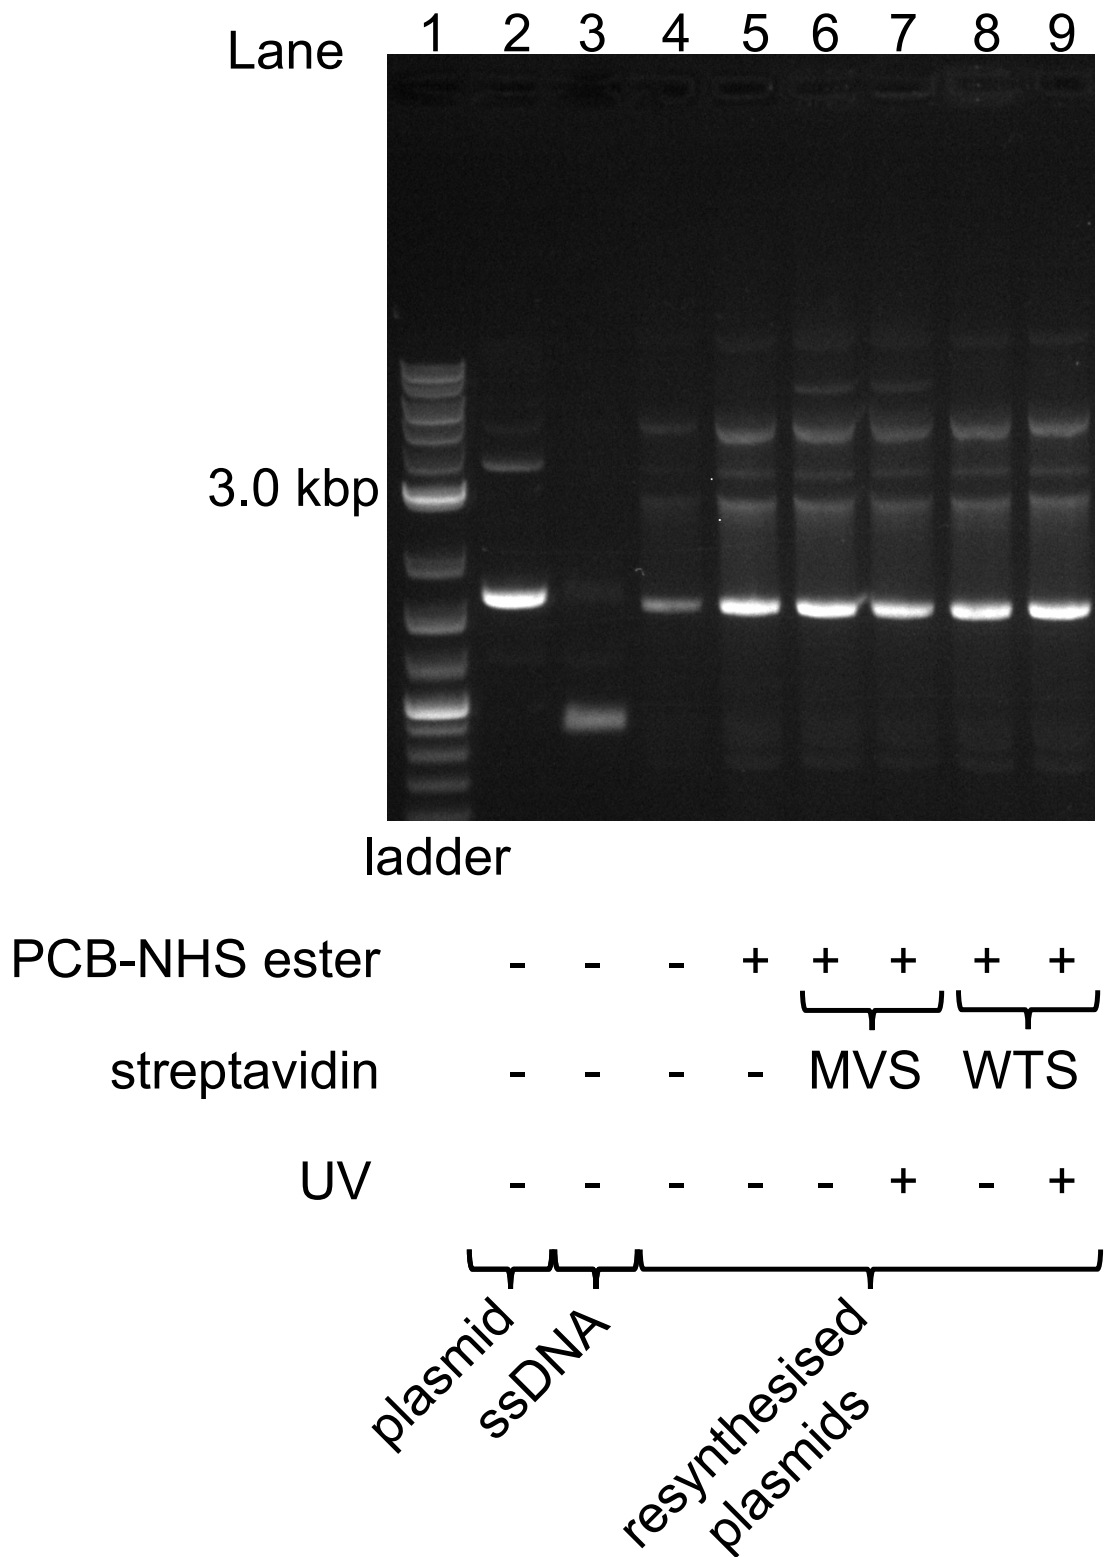

**SI Figure 7. Negative controls without amino modifications.** Plasmids were resynthesised using a regular primer without amino modifications. The absence of primary amine modifications prevented PCB conjugation and thereby streptavidin binding.

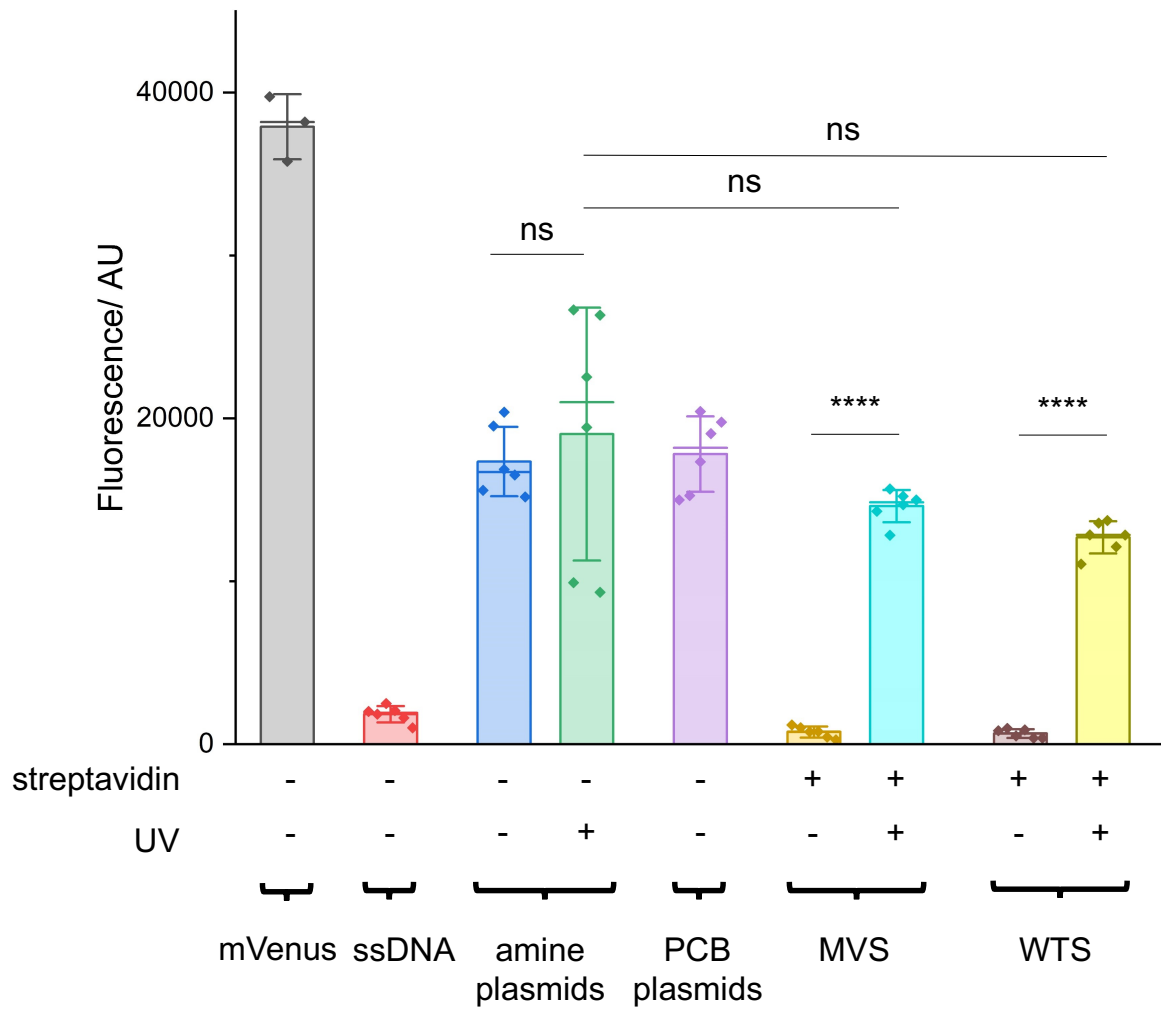

**SI Figure 8. CFPS of T7 NEEL plasmids including the native plasmid.** Plasmids containing the T7 promoter were prepared with NEEL and assessed using CFPS. Native plasmid and NTC were technical triplicates ( $n = 3$ ). Replicates, measurements, and statistical analysis were similar to those in **Figure 4B**.



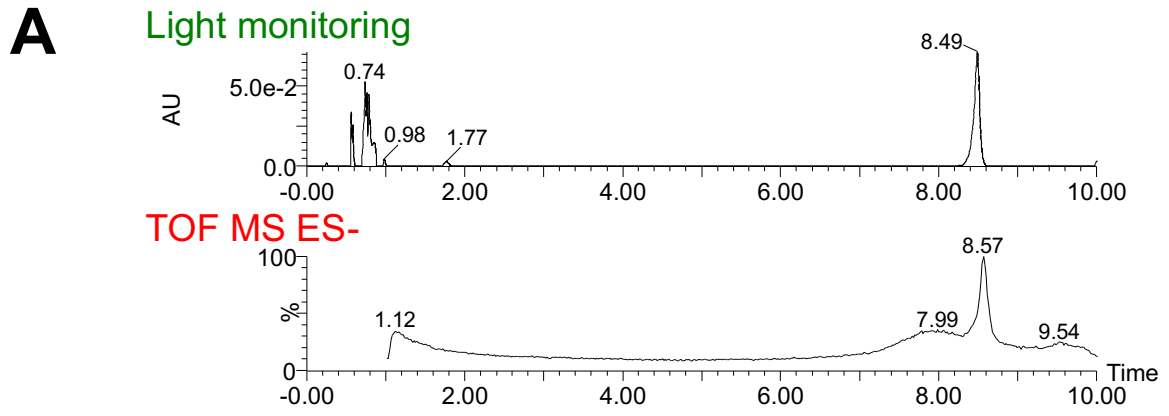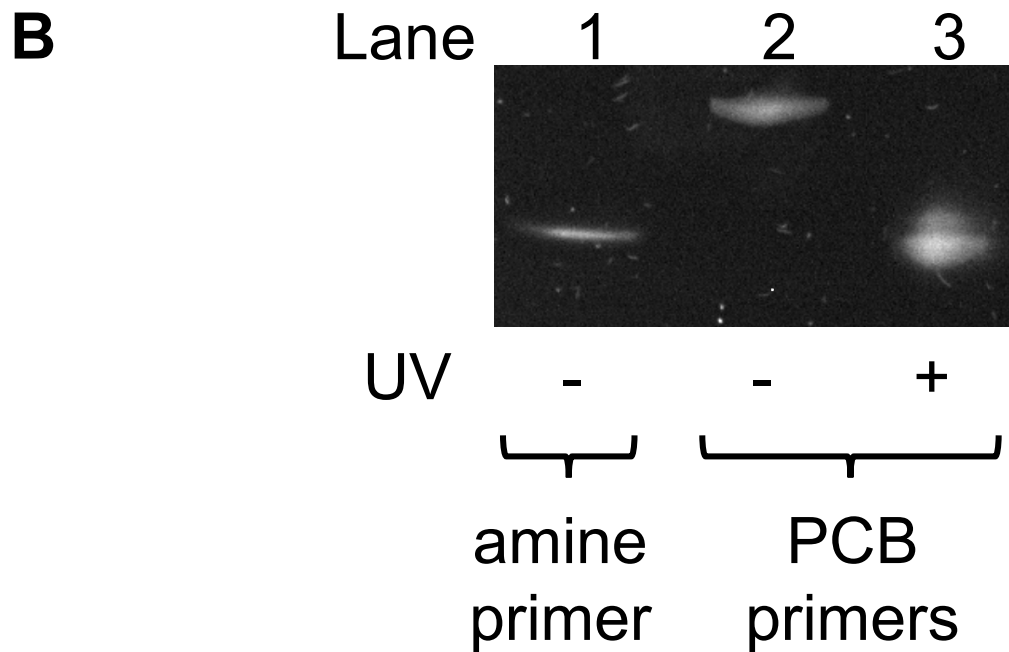

**SI Figure 9. Confirming synthesis of the CMV PCB oligo** A. LC-MS and B. Denaturing PAGE were used to confirm PCB attachment. MS gave a mass of 22076, which corresponded to the 9-PCBs oligo.

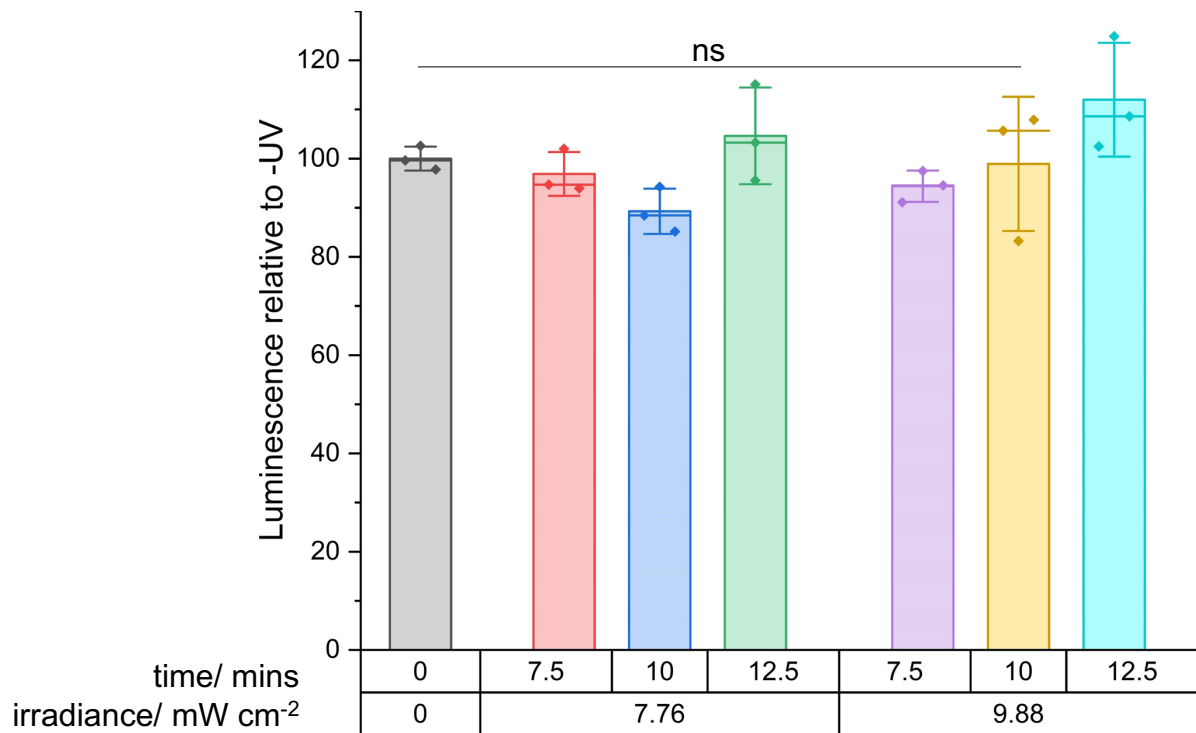

**SI Figure 10. Cell viability assay with optimised UV settings for transfection.** Cell viability assay with various UV settings. The conditions employed, 9.88 mW cm<sup>-2</sup> for 10 mins, had minimal damage to cells. Error bars showed standard deviations of technical triplicates ( $n = 3$ ). Two-tailed, unpaired Student's t-test was performed. ns = non-significant ( $P > .05$ ).

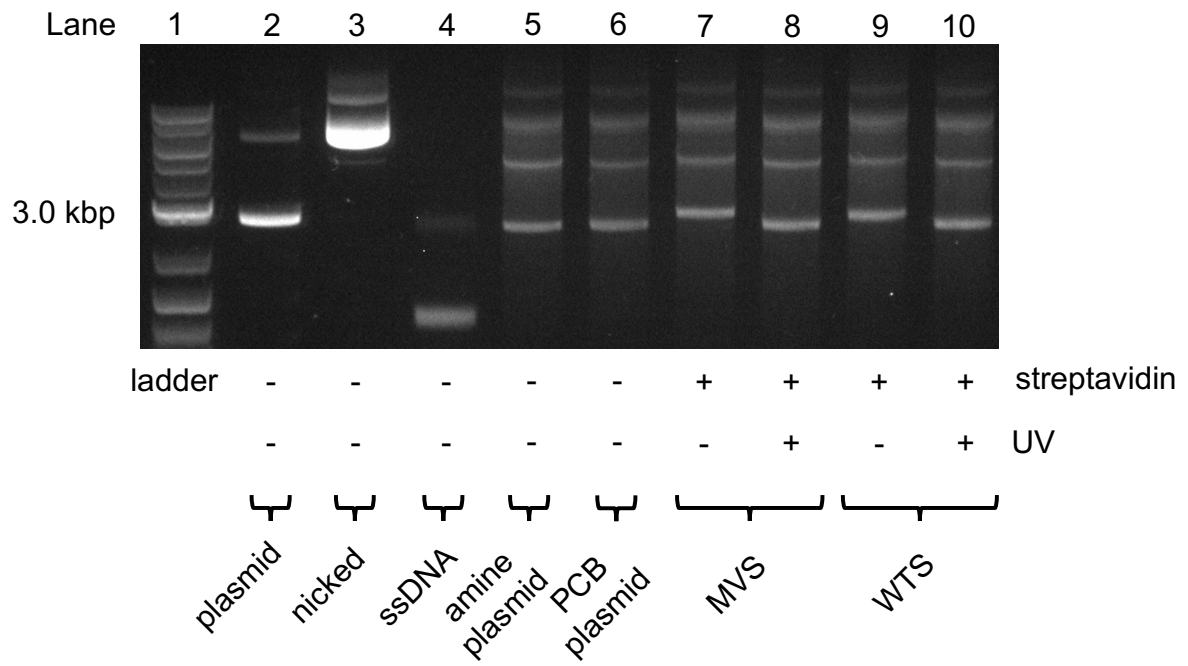

**SI Figure 11. CMV LA-plasmids and their uncaging.** The PCB plasmids were bound to streptavidins and uncaged using the optimised UV settings in SI Figure 10.

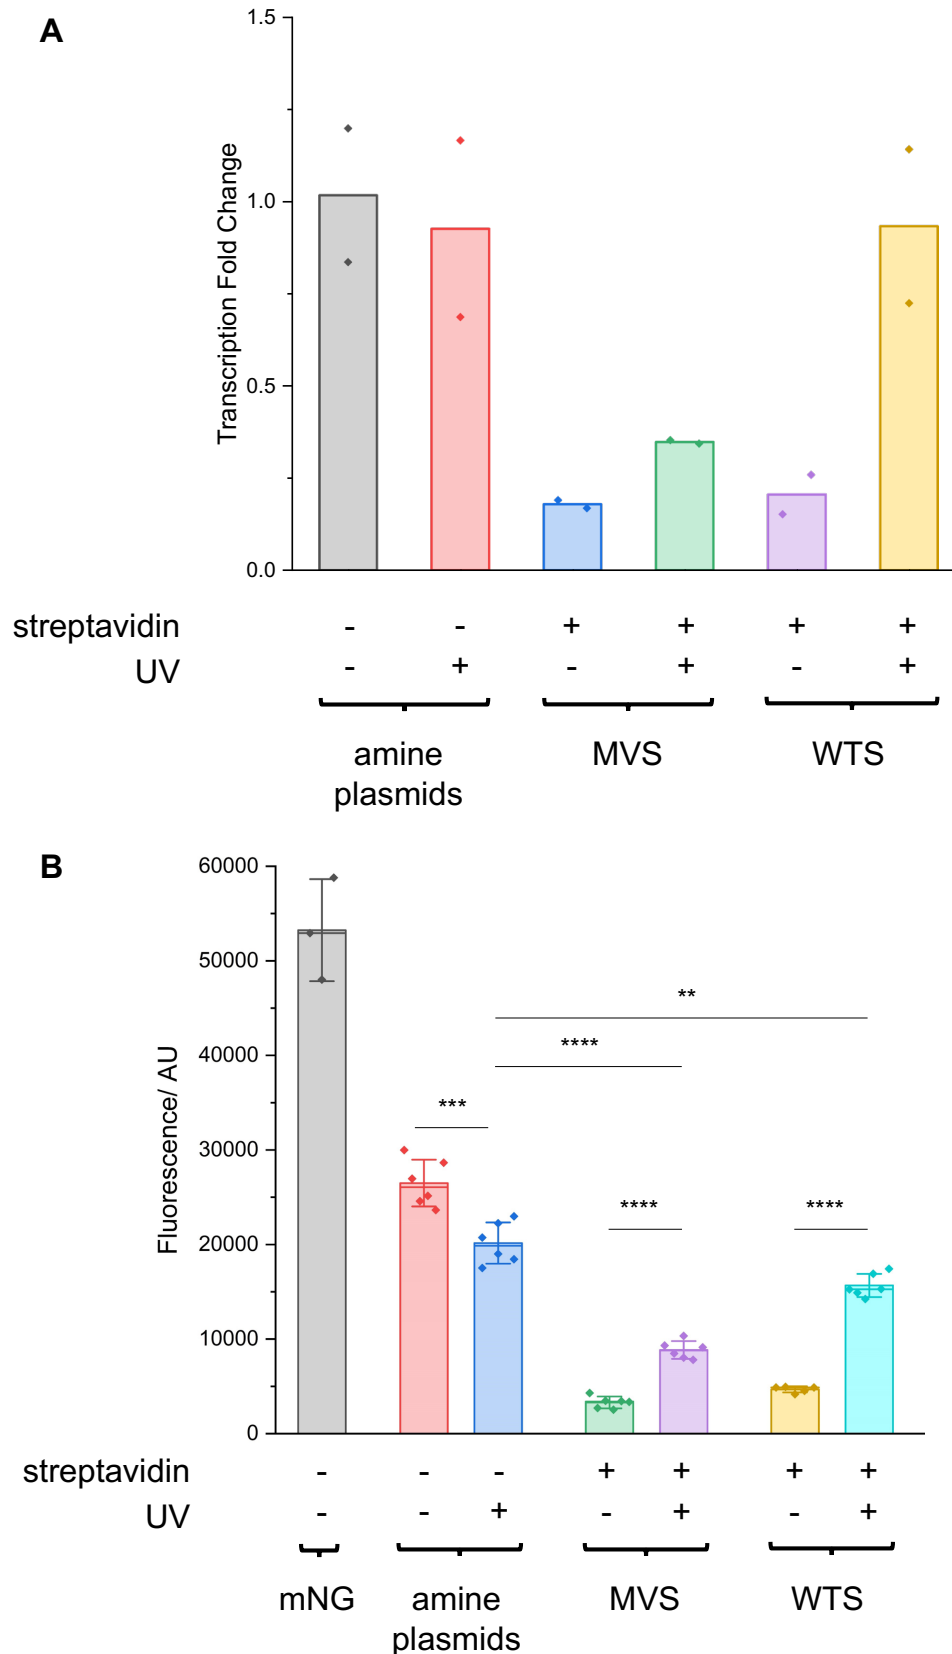

**SI Figure 12. RT-qPCR and fluorescence measurements of CMV NEEL plasmids, including the native plasmid.** Plasmids containing the CMV promoter were prepared with NEEL and assessed using **A**. RT-qPCR and **B**. Fluorescent plate reader. Replicates, measurements, and statistical analysis were similar to those in **Figure 5**.

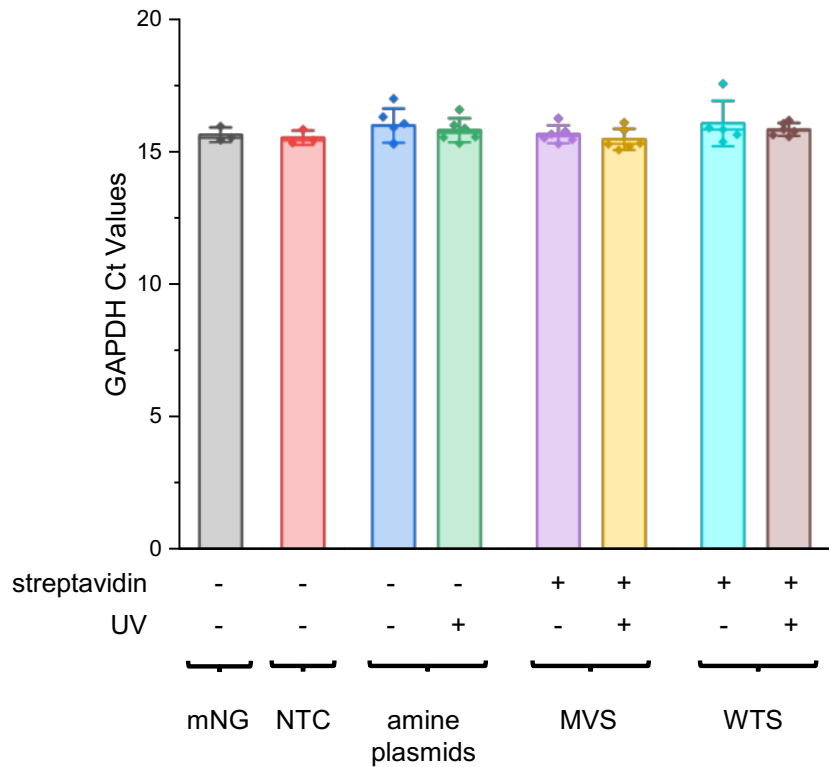

**SI Figure 13. GAPDH transcription levels after transfection with modified plasmids.** Plasmids containing the photocaged CMV promoter were transfected into HEK293T cells and irradiated with UV. RT-qPCR was performed and the Ct values of the GAPDH gene were compared. Error bars show standard deviations. Two-tailed, unpaired Student's t-test was performed. ns = non-significant ( $P > .05$ );  $^{**}.001 \leq P \leq .01$ ;  $^{***}.0001 \leq P \leq .001$  and  $^{****}P \leq .0001$ . 'mNG' and 'NTC' conditions were technical triplicates ( $n = 3$ ), and all other conditions were biological duplicates of technical triplicates ( $n = 6$ ) except for the 'WTS-UV' condition ( $n = 5$  due to sample loss).

## References

1. Karata, K., Vidal, A. E. & Woodgate, R. Construction of a circular single-stranded DNA template containing a defined lesion. *DNA Repair* **8**, 852–856 (2009).
2. Huang, R., Fang, P. & Kay, B. K. Improvements to the Kunkel mutagenesis protocol for constructing primary and secondary phage-display libraries. *Methods* **58**, 10–17 (2012).
3. Tonikian, R., Zhang, Y., Boone, C. & Sidhu, S. S. Identifying specificity profiles for peptide recognition modules from phage-displayed peptide libraries. *Nat Protoc* **2**, 1368–1386 (2007).
4. Handa, P. & Varshney, U. Rapid and reliable site directed mutagenesis using Kunkel's approach. *Indian J Biochem Biophys* **35**, 63–66 (1998).
